# Supplementary material for: Genomic characterization reveals probiotic potentials in Leuconostoc falkenbergense isolated from naturally fermented buffalo milk curd
Source: Research Square preprint supplement (doi:10.21203/rs.3.rs-7662231/v1), 2025-10-10
Supplement: Supplementary file 1 [file 0ed8290ba5a4461e7213ad10.docx]

**Supplementary Materials**

**
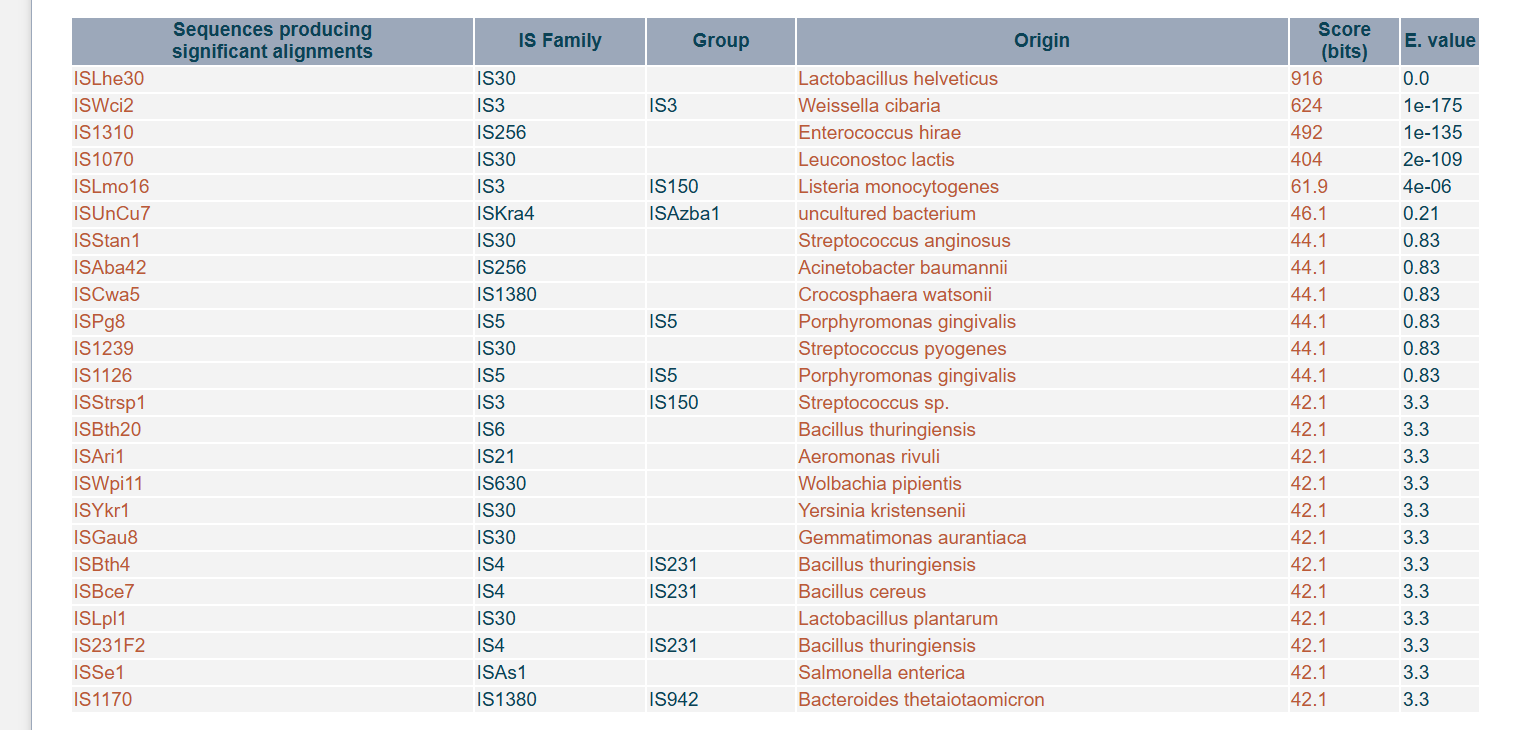
**

**Figure S1.** Insertion sequences (IS) elements in *L. falkenbergense* BSMRAU-M1L5 genome identified via ISfinder, including names, families, groups, origins, bit scores, and E-values.

**Table S1.** Assembly ID, isolation source, and country of origin of 22 *L. falkenbergense* strains.

| **SL. No** | **Assembly** | **Strain** | **Source** | **Country** |
| --- | --- | --- | --- | --- |
|  | [GCA_045801155.1](https://www.ncbi.nlm.nih.gov/datasets/genome/GCA_045801155.1/) | SAEED 24451 | Camel milk | Egypt |
|  | [GCA_016939455.1](https://www.ncbi.nlm.nih.gov/datasets/genome/GCA_016939455.1/) | FDAARGOS_1201 | Human | Germany |
|  | [GCF_039871445.1](https://www.ncbi.nlm.nih.gov/assembly/GCF_039871445.1) | OSY-112 | Cheese | USA |
|  | [GCF_036670195.1](https://www.ncbi.nlm.nih.gov/assembly/GCF_036670195.1) | P3A1 | Commercial probiotic | Denmark |
|  | [GCF_036670225.1](https://www.ncbi.nlm.nih.gov/assembly/GCF_036670225.1) | P3A3 | Commercial probiotic | Denmark |
|  | [GCF_033195155.1](https://www.ncbi.nlm.nih.gov/assembly/GCF_033195155.1) | UCMA20153 | Cider | France |
|  | [GCF_032911705.1](https://www.ncbi.nlm.nih.gov/assembly/GCF_032911705.1) | RO-1 | Cheese | Greece |
|  | [GCF_030361025.1](https://www.ncbi.nlm.nih.gov/assembly/GCF_030361025.1) | TOM.81 | Ayran | Russia |
|  | [GCF_030017075.1](https://www.ncbi.nlm.nih.gov/assembly/GCF_030017075.1) | LASM36 | Sugarcane | USA |
|  | [GCF_030017175.1](https://www.ncbi.nlm.nih.gov/assembly/GCF_030017175.1) | LASM18 | Sugarcane | USA |
|  | [GCF_032061125.1](https://www.ncbi.nlm.nih.gov/assembly/GCF_032061125.1) | CTOTU48847 | Urban | USA |
|  | [GCA_031987845.1](https://www.ncbi.nlm.nih.gov/datasets/genome/GCA_031987845.1/) | CTOTU47883 | Urban | USA |
|  | [GCF_026486025.1](https://www.ncbi.nlm.nih.gov/assembly/GCF_026486025.1) | 156 | Sweet potato leaves | Australia |
|  | [GCF_025211315.1](https://www.ncbi.nlm.nih.gov/assembly/GCF_025211315.1) | CIRM-BIA 876 | Kefir | Russia |
|  | [GCF_025211365.1](https://www.ncbi.nlm.nih.gov/assembly/GCF_025211365.1) | CIRM-BIA 1191 | Cheese | France |
|  | [GCF_025211425.1](https://www.ncbi.nlm.nih.gov/assembly/GCF_025211425.1) | CIRM-BIA 1261 | Plant | Italy |
|  | [GCF_025211415.1](https://www.ncbi.nlm.nih.gov/assembly/GCF_025211415.1) | CIRM-BIA 1240 | Cheese | Spain |
|  | [GCF_025211065.1](https://www.ncbi.nlm.nih.gov/assembly/GCF_025211065.1) | LBAE K30 | Wheat sourdough | France |
|  | [GCF_014634865.1](https://www.ncbi.nlm.nih.gov/assembly/GCF_014634865.1) | LMG 18969 | Fermenting string beans | China |
|  | [GCF_014634785.1](https://www.ncbi.nlm.nih.gov/assembly/GCF_014634785.1) | C | Yogurt | China |
|  | [GCF_014634805.1](https://www.ncbi.nlm.nih.gov/assembly/GCF_014634805.1) | LMG 10779 | Lactic culture | Sweden-1 |
|  | [GCA_034120155.1](https://www.ncbi.nlm.nih.gov/datasets/genome/GCA_034120155.1/) | BSMRAU-M1L5 | Card | Bangladesh |

**Table S2.** Stain-specific genes of *L. falkenbergense* BSMRAU-M1L5.

| SL no. | Gene | Annotation |
| --- | --- | --- |
|  | xylB_3 | Xylulose kinase |
|  | group_1286 | hypothetical protein |
|  | melA_1 | Alpha-galactosidase Mel36A |
|  | group_1341 | Alpha-galactosidase AgaA |
|  | group_165 | hypothetical protein |
|  | galK_3 | Galactokinase |
|  | group_1718 | Galactokinase |
|  | group_1767 | hypothetical protein |
|  | group_2462 | hypothetical protein |
|  | group_2463 | hypothetical protein |
|  | group_305 | hypothetical protein |
|  | group_3337 | hypothetical protein |
|  | group_3343 | Tyrosine recombinase XerC |
|  | group_3344 | hypothetical protein |
|  | group_3345 | hypothetical protein |
|  | group_3346 | hypothetical protein |
|  | group_3347 | hypothetical protein |
|  | group_3348 | hypothetical protein |
|  | group_3349 | hypothetical protein |
|  | group_3350 | hypothetical protein |
|  | group_3351 | hypothetical protein |
|  | group_3352 | hypothetical protein |
|  | group_3353 | hypothetical protein |
|  | group_3354 | hypothetical protein |
|  | group_3355 | Single-stranded DNA-binding protein |
|  | group_3356 | hypothetical protein |
|  | group_3357 | hypothetical protein |
|  | group_3358 | hypothetical protein |
|  | group_3359 | hypothetical protein |
|  | group_3360 | hypothetical protein |
|  | group_3361 | hypothetical protein |
|  | group_3362 | hypothetical protein |
|  | group_3363 | hypothetical protein |
|  | group_3364 | hypothetical protein |
|  | group_3369 | hypothetical protein |
|  | group_3370 | hypothetical protein |
|  | group_3372 | hypothetical protein |
|  | group_3373 | hypothetical protein |
|  | group_3374 | hypothetical protein |
|  | group_3375 | hypothetical protein |
|  | group_3376 | hypothetical protein |
|  | group_3377 | hypothetical protein |
|  | group_3378 | hypothetical protein |
|  | group_3379 | hypothetical protein |
|  | group_3380 | hypothetical protein |
|  | group_3381 | hypothetical protein |
|  | group_3382 | hypothetical protein |
|  | group_3383 | hypothetical protein |
|  | group_3384 | hypothetical protein |
|  | group_3385 | hypothetical protein |
|  | group_3386 | hypothetical protein |
|  | group_3387 | hypothetical protein |
|  | group_3388 | hypothetical protein |
|  | aldh_1 | Aldehyde dehydrogenase |
|  | recG_2 | ATP-dependent DNA helicase RecG |
|  | mutS_2 | DNA mismatch repair protein MutS |
|  | mutL_2 | DNA mismatch repair protein MutL |
|  | group_3393 | hypothetical protein |
|  | ndkA_2 | Nucleoside diphosphate kinase |
|  | murB_2 | UDP-N-acetylenolpyruvoylglucosamine reductase |
|  | nhaK_3 | Sodium, potassium, lithium and rubidium/H(+) antiporter |
|  | cdaA_2 | Cyclic di-AMP synthase CdaA |
|  | cdaR_2 | CdaA regulatory protein CdaR |
|  | glmM_2 | Phosphoglucosamine mutase |
|  | rnc_2 | Ribonuclease 3 |
|  | group_3401 | Chromosome partition protein Smc |
|  | group_3403 | hypothetical protein |
|  | group_3404 | hypothetical protein |
|  | group_3405 | hypothetical protein |
|  | group_3406 | hypothetical protein |
|  | group_3407 | hypothetical protein |
|  | group_3408 | hypothetical protein |
|  | group_3409 | hypothetical protein |
|  | group_3410 | hypothetical protein |
|  | group_3411 | hypothetical protein |
|  | group_3413 | hypothetical protein |
|  | group_3414 | hypothetical protein |
|  | clpP_3 | ATP-dependent Clp protease proteolytic subunit |
|  | group_3417 | hypothetical protein |
|  | group_3418 | hypothetical protein |
|  | group_3419 | hypothetical protein |
|  | group_3420 | hypothetical protein |
|  | group_3421 | hypothetical protein |
|  | group_3422 | hypothetical protein |
|  | group_3423 | hypothetical protein |
|  | group_3424 | hypothetical protein |
|  | group_3425 | hypothetical protein |
|  | group_3426 | hypothetical protein |
|  | group_3427 | hypothetical protein |
|  | group_3428 | hypothetical protein |
|  | group_3429 | hypothetical protein |
|  | group_3430 | hypothetical protein |
|  | group_3431 | hypothetical protein |
|  | group_3432 | hypothetical protein |
|  | group_3433 | hypothetical protein |
|  | group_3434 | hypothetical protein |
|  | group_3435 | hypothetical protein |
|  | group_3436 | hypothetical protein |
|  | group_3437 | hypothetical protein |
|  | group_3440 | hypothetical protein |
|  | group_3441 | hypothetical protein |
|  | group_3442 | hypothetical protein |
|  | group_3443 | hypothetical protein |
|  | group_3444 | hypothetical protein |
|  | group_3445 | hypothetical protein |
|  | group_3446 | Putative prophage phiRv2 integrase |
|  | group_3447 | hypothetical protein |
|  | group_3448 | hypothetical protein |
|  | group_3449 | hypothetical protein |
|  | group_3450 | hypothetical protein |
|  | group_3451 | hypothetical protein |
|  | group_3452 | hypothetical protein |
|  | group_3453 | Vancomycin B-type resistance protein VanW |
|  | group_3473 | hypothetical protein |
|  | engB_2 | putative GTP-binding protein EngB |
|  | group_3475 | hypothetical protein |
|  | group_3477 | hypothetical protein |
|  | group_3478 | hypothetical protein |
|  | group_3479 | hypothetical protein |
|  | group_446 | hypothetical protein |
|  | group_568 | Lichenan permease IIC component |
|  | group_595 | hypothetical protein |
|  | group_710 | Lactose permease |
|  | xerC_8 | Tyrosine recombinase XerC |

**Table S3.** Complete pathway modules of *L. falkenbergense* BSMRAU-M1L5.

| Category | Complete pathway modules | Module ID |
| --- | --- | --- |
| Glycolysis / Gluconeogenesis | Pyruvate oxidation | [M00307](https://www.kegg.jp/module/M00307/17257837263853784/color.args.multi) |
|  | Glycolysis, core module involving three-carbon compounds | [M00002](https://www.kegg.jp/module/M00002/17257837263853784/color.args.multi) |
| Pentose phosphate pathway | PRPP biosynthesis | [M00005](https://www.kegg.jp/module/M00005/17257839753909699/color.args.multi) |
|  | Pentose phosphate pathway, oxidative phase | [M00006](https://www.kegg.jp/module/M00006/17257839753909699/color.args.multi) |
| Other carbohydrate metabolism | Ascorbate degradation, ascorbate | [M00550](https://www.kegg.jp/kegg-bin/show_module?17398553623116225/M00550.args.multi) |
| Amino sugar and nucleotide sugar metabolism | Nucleotide sugar biosynthesis | [M00549](https://www.kegg.jp/module/M00549/17257841953959873/color.args.multi) |
|  | UDP-N-acetyl-D-glucosamine biosynthesis, prokaryotes | [M00909](https://www.kegg.jp/module/M00909/17257841953959873/color.args.multi) |
| Pyruvate metabolism | Phosphate acetyltransferase-acetate kinase pathway | [M00579](https://www.kegg.jp/module/M00579/17257841973960279/color.args.multi) |
| Oxidative phosphorylation | F-type ATPase, prokaryotes and chloroplasts | [M00157](https://www.kegg.jp/module/M00157/17257843744008119/color.args.multi) |
| Fatty acid biosynthesis | Fatty acid biosynthesis, initiation | [M00082](https://www.kegg.jp/module/M00082/17257844804032575/color.args.multi) |
|  | Fatty acid biosynthesis, elongation | [M00083](https://www.kegg.jp/module/M00083/17257844804032575/color.args.multi) |
| Purine metabolism | De novo purine biosynthesis | [M00048](https://www.kegg.jp/module/M00048/17257845534051337/color.args.multi) |
|  | Guanine ribonucleotide biosynthesis | [M00050](https://www.kegg.jp/module/M00050/17257845534051337/color.args.multi) |
|  | Deoxyribonucleotide biosynthesis | [M00053](https://www.kegg.jp/module/M00053/17257845534051337/color.args.multi) |
| Pyrimidine metabolism | Pyrimidine ribonucleotide biosynthesis | [M00052](https://www.kegg.jp/module/M00052/17257845554051665/color.args.multi) |
|  | Pyrimidine deoxyribonucleotide biosynthesis | [M00938](https://www.kegg.jp/module/M00938/17257845554051665/color.args.multi) |
| Serine and threonine metabolism | Threonine biosynthesis | [M00018](https://www.kegg.jp/kegg-bin/show_module?17398553623116225/M00018.args.multi) |
| Cysteine and methionine metabolism | Cysteine biosynthesis | [M00021](https://www.kegg.jp/kegg-bin/show_module?17398553623116225/M00021.args.multi) |
| Branched-chain amino acid metabolism | Leucine biosynthesis | [M00432](https://www.kegg.jp/kegg-bin/show_module?17398553623116225/M00432.args.multi) |
| Arginine and proline metabolism | Ornithine biosynthesis | M00028 |
|  | Proline biosynthesis | [M00015](https://www.kegg.jp/kegg-bin/show_module?17398553623116225/M00015.args.multi) |
| Aromatic amino acid metabolism | Shikimate pathway | [M00022](https://www.kegg.jp/kegg-bin/show_module?17398553623116225/M00022.args.multi) |
| Cofactor and vitamin metabolism | Thiamine salvage pathway | [M00899](https://www.kegg.jp/kegg-bin/show_module?17398553623116225/M00899.args.multi) |
|  | Coenzyme A biosynthesis | [M00120](https://www.kegg.jp/kegg-bin/show_module?17398553623116225/M00120.args.multi) |
|  | C1-unit interconversion | [M00140](https://www.kegg.jp/kegg-bin/show_module?17398553623116225/M00140.args.multi) |
|  | Menaquinone biosynthesis | [M00116](https://www.kegg.jp/kegg-bin/show_module?17398553623116225/M00116.args.multi) |
| Terpenoid backbone biosynthesis | C10-C20 isoprenoid biosynthesis | [M00364](https://www.kegg.jp/kegg-bin/show_module?17398553623116225/M00364.args.multi) |

**Table S4.** CRISPR-Cas elements identified in the genome of *L. falkenbergense* BSMRAU-M1L5.

| **Element** | **Type / ID** | **Start** | **End** | **Spacers / Genes** | **Repeat consensus / Cas genes** | **Evidence Level** |
| --- | --- | --- | --- | --- | --- | --- |
| Cas cluster | CAS | 47732 | 53948 | 4 | cas2_TypeI-II-III, cas1_TypeII, cas9_TypeII, csn2_TypeIIA | – |
| Cas cluster | CAS-TypeIIA | 53283 | 53948 | 1 | csn2_TypeIIA | – |
| CRISPR | NZ_JAVUPV010000002_1 | 53969 | 54400 | 6 | GCTTCAGATGTATGTCAGATCAATGGGGCTTTATAC | 4 |
| Cas cluster | CAS | 29498 | 31087 | 2 | cas3_TypeI, cas3_TypeI | – |
| Cas cluster | CAS | 16387 | 17754 | 2 | cas3_TypeI, cas3_TypeI | – |
| Cas cluster | CAS | 35240 | 36514 | 2 | cas3_TypeI, cas3_TypeI | – |
| Cas cluster | CAS | 26899 | 28194 | 2 | cas3_TypeI, cas3_TypeI | – |
| Cas cluster | CAS | 4098 | 4856 | 1 | cas4_TypeI-II | – |

**Table S5.** Prohages identified in the genome of *L. falkenbergense* BSMRAU-M1L5.

| **Prophage Region** | **Length (Kb)** | **Completeness** | **Most Common Phage Homology** |
| --- | --- | --- | --- |
| NZ_JAVUPV010000002.1 | 137.6 | Intact | PHAGE_Lactob_Sha1 |
| NZ_JAVUPV010000029.1 | 217.4 | Incomplete | PHAGE_Strept_phi3396 |
